# Supplementary material
Source: MDPI journal article supplement (https://www.mdpi.com/1999-4907/14/4/671)
Supplement: s1 [file s1]

### Supplementary Materials:

Table S1 Means and standard deviation [SD] of all measured and calculated trees' structural data *D. regia*, *F. nitida* and *P. dactylifera*. Where n— number of samples, dbh— diameter at breast height, h-tree height, cl-crown length, cd-crown diameter, cpa -crown projection area, and cv-crown volume, respectively.

| Age                   | n  | dbh [cm]<br>Mean±SD | h [m]<br>Mean±SD | cl [m]<br>Mean±SD | cd [m]<br>Mean±SD | cpa [m <sup>2</sup> ]<br>Mean±SD | cv [m <sup>3</sup> ]<br>Mean |
|-----------------------|----|---------------------|------------------|-------------------|-------------------|----------------------------------|------------------------------|
| <i>D. regia</i>       |    |                     |                  |                   |                   |                                  |                              |
| ≤25                   | 69 | 35.28±11.09         | 5.7±1.24         | 3.79±1.29         | 7.98±1.72         | 52.38±22.10                      | 101.09±51.71                 |
| <i>F. nitida</i>      |    |                     |                  |                   |                   |                                  |                              |
| ≤15                   | 30 | 17.0± 2.68          | 4.7±0.58         | 3.1±0.65          | 4.76 ±0.99        | 18.51±7.79                       | 29.041±15.50                 |
| 16-25                 | 34 | 31.89±1.52          | 6.9±1.52         | 4.8 ±1.47         | 8.28±2.65         | 59.2 ±43.91                      | 160±186.06                   |
| ≥25                   | 9  | 51.95±9.93          | 8.3 ±1.67        | 5.93 ±1.06        | 8.07 ±2.12        | 54.33 ±27.33                     | 172±109.32                   |
| <i>P. dactylifera</i> |    |                     |                  |                   |                   |                                  |                              |
| ≤25                   | 10 | 43.74±3.80          | 13.41±1.09       | 4.95±1.13         | 5.64±0.48         | 25.10±4.26                       | 95.48±24.28                  |
| 30-79                 | 22 | 45.77 ±5.56         | 13.83±2.65       | 3.18±1.47         | 5.39±1.67         | 23.79±15.45                      | 99.96±95.70                  |
| ≥80                   | 38 | 49.32 ±8.77         | 13.48±3.57       | 2.58±1.59         | 4.57±1.19         | 18.02±8.94                       | 62.58±46.84                  |

Table S2 Results of the regression analysis of LAI, the predictor variables, and the tree variables (dbh, h, cd and cv) as a response and the regression equation (y)=a+b×ln(x). The table below lists the determination of R<sup>2</sup>, standard error and p-values.

| (y) = a + b × ln(x)   |                |    |      |        |         |      |                |
|-----------------------|----------------|----|------|--------|---------|------|----------------|
| Species               | Parameters     | n  | a    | b      | p-value | SE   | R <sup>2</sup> |
| <i>D. regia</i>       | LAI vs ln(dbh) | 69 | 3.60 | 0.01   | 0.44    | 0.02 | <0.01          |
|                       | LAI vs ln(h)   | 69 | 1.69 | 0.01   | 0.72    | 0.01 | 0.22           |
|                       | LAI vs ln(cv)  | 69 | 4.79 | (0.06) | 0.14    | 0.04 | 0.03           |
|                       | LAI vs ln(cd)  | 69 | 2.26 | (0.03) | 0.01*   | 0.01 | 0.08           |
| <i>F. nitida</i>      | LAI vs ln(dbh) | 71 | 3.35 | (0.02) | 0.47    | 0.03 | 0.01           |
|                       | LAI vs ln(h)   | 71 | 1.82 | (0.01) | 0.74    | 0.02 | 0.01           |
|                       | LAI vs ln(cv)  | 71 | 4.50 | (0.06) | 0.37    | 0.07 | 0.01           |
|                       | LAI vs ln(cd)  | 71 | 2.03 | (0.03) | 0.13    | 0.02 | 0.03           |
| <i>P. dactylifera</i> | LAI vs ln(dbh) | 48 | 3.95 | (0.39) | (0.05)  | 0.02 | 0.08           |
|                       | LAI vs ln(h)   | 48 | 2.82 | (0.08) | 0.01*   | 0.03 | 0.13           |
|                       | LAI vs ln(cv)  | 48 | 3.74 | 0.16   | 0.09    | 0.09 | 0.06           |
|                       | LAI vs ln(cd)  | 48 | 1.46 | 0.05   | 0.09    | 0.03 | 0.06           |

Table S3 Mean of the tree pit and related standard error to the growth site for *D. regia*, *F. nitida*, and *P. dactylifera*, as well as the p-values for each ANOVA. Mean values in the same column differ significantly when followed by different letters.

| Species              | site         | Mean tree pit | Standard error |
|----------------------|--------------|---------------|----------------|
| P=<0.001 ***         |              |               |                |
| <i>F.nitida</i>      | Street       | 13.6a         | 4.37           |
|                      | parking lot  | 23.2a         | 6.27           |
|                      | Public place | 58.9b         | 7.05           |
| P=<0.001 **          |              |               |                |
| <i>D.regia</i>       | Street       | 57.71b        | 5.98           |
|                      | parking lot  |               |                |
|                      | Public place | 5.11a         | 19.23          |
| P=0.363              |              |               |                |
| <i>P.dactylifera</i> | Street       | 301.1a        | 7.15           |
|                      | Square       | 16.7a         | 12.38          |
|                      | Public place | 34.7a         | 3.92           |

Table S4 Results of the summary of the linear mixed model regression analysis of a carbon fixation and the predictor variables, and the tree variables (h, dbh, cd, and age) as a response and the regression equation  $\ln(y) = a + b1 \times \ln(x1) + b2 \times \ln(x2) + b3 \times \ln(x3) + \varepsilon$ . The table below lists the determination of R<sup>2</sup>,  $\tau_{00}$  : variance of random intercept, N site" refers to the number of distinct groups or sites in the data, where each group may have multiple observations, N T.pit" refers to the number of total observations or data points in all the sites, which is equal to the sum of the number of observations in each site,  $\sigma^2$  refers to the residual variance, and p-values.

| Species               | Observations | Predictors  | Estimates | p      | Random Effects          |                            |
|-----------------------|--------------|-------------|-----------|--------|-------------------------|----------------------------|
| <i>D. regia</i>       | 69           | (Intercept) | -235      | <0.001 | Marginal R <sup>2</sup> | Conditional R <sup>2</sup> |
|                       |              | dbh [cm]    | 4.44      | <0.001 | 0.996                   | 0.999                      |
|                       |              | h           | 0.48      | <0.001 | $\sigma^2 = 0$          | $\tau_{00}$ site, T.pit=0  |
|                       |              | cd          | 0.23      | <0.001 | N site =2               | N T.pit = 63               |
| <i>F. nitida</i>      | 73           | (Intercept) | -2.81     | <0.001 | Marginal R <sup>2</sup> | Conditional R <sup>2</sup> |
|                       |              | dbh [cm]    | 4.52      | <0.001 | 0.963                   | 0.978                      |
|                       |              | h           | 0.89      | <0.001 | $\sigma^2 = 0$          | $\tau_{00}$ site, T.pit=0  |
|                       |              | cd          | 0.27      | <0.001 | N site =4               | N T.pit = 65               |
| <i>P. dactylifera</i> | 70           | (Intercept) | 1.48      | <0.001 | Marginal R <sup>2</sup> | Conditional R <sup>2</sup> |
|                       |              | h           | 2         | <0.001 | 0.71                    | 0.75                       |
|                       |              | cd          | 0.31      | 0.024  | $\sigma^2 = 0.02$       | $\tau_{00}$ site, T.pit=0  |
|                       |              | Age         | 0.31      | 0.002  | N site =70              | N T.pit = 0                |

Table S5 Results of the summary of linear mixed model regression analysis of a shaded area and the predictor variables, and the tree variables (h, dbh, cd, and age) as a response and the regression equation  $n(y) = a + b1 \times \ln(x1) + b2 \times \ln(x2) + \epsilon$ . The table below lists the determination of  $R^2$ ,  $\tau_{00}$  : variance of random intercept, N site" refers to the number of distinct groups or sites in the data, where each group may have multiple observations , N T.pit" refers to the number of total observations or data points in all the sites, which is equal to the sum of the number of observations in each site,  $\sigma^2$  refers to the residual variance, and p-values.

| Species               | Observations | Predictors  | Estimates | p      | Random Effects         |                              |
|-----------------------|--------------|-------------|-----------|--------|------------------------|------------------------------|
| <i>D. regia</i>       | 69           | (Intercept) | 1.29      | 0.031  | Marginal $R^2 = 0.189$ | Conditional $R^2 = 0.644$    |
|                       |              | h           | 1.19      | 0.056  | $\sigma^2 = 0.09$      | $\tau_{00}$ site:T.pit= 0.12 |
|                       |              | cd          | 1.63      | 0.008  | N site=2               | N T.pit=63                   |
| <i>F. nitida</i>      | 73           | (Intercept) | -0.52     | <0.001 | Marginal $R^2 = 0.943$ | Conditional $R^2 = 0.951$    |
|                       |              | h           | 2.95      | <0.001 | $\sigma^2 = 0.02$      | $\tau_{00}$ site:T.pit= 0.0  |
|                       |              | cd          | 2.25      | <0.001 | N site=4               | N T.pit=65                   |
| <i>P. dactylifera</i> | 48           | (Intercept) | 8.52      | 0.012  | Marginal $R^2 = 0.085$ | Conditional $R^2 = 0.178$    |
|                       |              | h           | -3.23     | 0.066  | $\sigma^2 = 0.52$      | $\tau_{00}$ site:T.pit= 0.06 |
|                       |              | cd          | -0.26     | 0.796  | N site=3               | N T.pit=0                    |
